# Supplementary material for: CRISPR-clear imaging of melanin-rich B16-derived solid tumors
Source: Springer Nature journal article supplement (doi:10.1038/s42003-023-04614-7), 2023-04-04
Supplement: MOESM2 [file 42003_2023_4614_MOESM2_ESM.pdf]

Preview


Thumbnails

Document Outline

Find:


Previous
Next

Highlight all

Match case

Full Screen Mode

Print

Download
Go to First Page

Go to Last Page
Rotate Clockwise

Rotate Counterclockwise
Enable hand tool
Document Properties…

Toggle Sidebar
Find

Previous
Next

Page:

Full Screen Mode

Print

Download
Tools

Zoom Out
Zoom In

Automatic Zoom
Actual Size
Fit Page
Full Width

50%
75%
100%
125%
150%
200%


More Information

Less Information

Close

Enter the password to open this PDF file:

Cancel
OK

File name:

-

File size:

-

Title:

-

Author:

-

Subject:

-

Keywords:

-

Creation Date:

-

Modification Date:

-

Creator:

-

PDF Producer:

-

PDF Version:

-

Page Count:

-

Close

Preparing document for printing...

0%
